# Supplementary material for: The Arsenic–Antimony Creek at Sauerbrunn/Burgenland, Austria: A Toxic Habitat for Amphibians
Source: MDPI journal article supplement (doi:10.3390/ijerph19106010), 2022-05-15
Supplement: s1 [file s1]

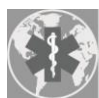

**Supplement Table S1: Number of samples for each water parameter and sampling point**

| Sampling Point                                       | pH Value | Conductivity | Temperature | Oxygen | Carbonate Hardness | Flow Speed |
|------------------------------------------------------|----------|--------------|-------------|--------|--------------------|------------|
| Point source (well)                                  | 8        | 9            | 11          | 8      | 7                  | 4          |
| Point source                                         | 6        | 6            | 8           | 5      | 3                  | 2          |
| Pond in meadow                                       | 5        | 7            | 7           | 4      | 3                  | n.d.       |
| Main Well (0 m)                                      | 9        | 13           | 13          | 9      | 5                  | 5          |
| Creek (3 m)                                          | 7        | 11           | 11          | 7      | 4                  | 5          |
| Pond (6 m)                                           | 8        | 12           | 12          | 8      | 7                  | 2          |
| Creek (19 m)                                         | 10       | 11           | 13          | 10     | 7                  | 4          |
| Influx of point source (29 m)                        | 9        | 14           | 16          | 11     | 9                  | 8          |
| Creek (54 m)                                         | 9        | 9            | 11          | 10     | 5                  | 2          |
| Creek (90 m)                                         | 8        | 10           | 12          | 11     | 7                  | 4          |
| Creek (139 m)                                        | 11       | 12           | 14          | 12     | 8                  | 4          |
| Start of 1 <sup>st</sup> underground (173 m)         | 5        | 8            | 8           | 6      | 4                  | 4          |
| 1 <sup>st</sup> underground passage (215 m)          | 3        | 7            | 7           | 5      | 4                  | 4          |
| End of 1 <sup>st</sup> underground passage (253 m)   | 7        | 10           | 10          | 8      | 6                  | 4          |
| Start of 2 <sup>nd</sup> underground passage (283 m) | 12       | 14           | 13          | 13     | 9                  | 4          |
| End of 2 <sup>nd</sup> underground passage (384 m)   | 8        | 12           | 10          | 10     | 6                  | 2          |
| Creek (399 m)                                        | 6        | 10           | 9           | 9      | 5                  | 2          |
| Influx into Tauchenbach (402 m)                      | 7        | 11           | 9           | 9      | 5                  | 2          |
| Total                                                | 138      | 186          | 194         | 155    | 104                | 62         |

**Supplement Table S2: Number Amphibian sightings per species and year**

| Species                      | Sighting | Year |
|------------------------------|----------|------|
| <i>Salamandra salamandra</i> | 1        | 2008 |
| <i>Salamandra salamandra</i> | 1        | 2015 |
| <i>Rana temporaria</i>       | 1        | 2015 |
| <i>Bombina variegata</i>     | 1        | 2015 |
| <i>Rana temporaria</i>       | 20       | 2015 |
| <i>Rana temporaria</i>       | 1        | 2015 |
| <i>Rana temporaria</i>       | 30       | 2015 |
| <i>Rana temporaria</i>       | 1        | 2015 |
| <i>Salamandra salamandra</i> | 1        | 2016 |
| <i>Salamandra salamandra</i> | 36       | 2016 |
| <i>Salamandra salamandra</i> | 1        | 2016 |
| <i>Salamandra salamandra</i> | 6        | 2016 |
| <i>Salamandra salamandra</i> | 16       | 2016 |
| <i>Rana temporaria</i>       | 1        | 2016 |
| <i>Rana temporaria</i>       | 1        | 2016 |
| <i>Rana temporaria</i>       | 1        | 2016 |

| Species                      | Sighting | Year |
|------------------------------|----------|------|
| <i>Natrix natrix</i>         | 1        | 2016 |
| <i>Rana temporaria</i>       | 1        | 2016 |
| <i>Salamandra salamandra</i> | 2        | 2016 |
| <i>Bombina variegata</i>     | 2        | 2016 |
| <i>Rana temporaria</i>       | 4        | 2016 |
| <i>Rana temporaria</i>       | 1        | 2016 |
| <i>Salamandra salamandra</i> | 5        | 2017 |
| <i>Salamandra salamandra</i> | 1        | 2017 |
| <i>Salamandra salamandra</i> | 6        | 2017 |
| <i>Salamandra salamandra</i> | 4        | 2017 |
| <i>Rana temporaria</i>       | 3        | 2017 |
| <i>Bombina variegata</i>     | 1        | 2017 |
| <i>Salamandra salamandra</i> | 5        | 2017 |
| <i>Rana temporaria</i>       | 1        | 2017 |
| <i>Bombina variegata</i>     | 1        | 2017 |
